# Supplementary material for: TUBA1A mutation can cause a hydranencephaly-like severe form of cortical dysgenesis
Source: Sci Rep. 2015 Oct 23;5:15165. doi: 10.1038/srep15165 (PMC4615979; doi:10.1038/srep15165)
Supplement: Supplementary Information [file srep15165-s1.pdf]

***TUBA1A* mutation can cause a  
hydranencephaly-like severe form of cortical  
dysgenesis**

Setsuri Yokoi, Naoko Ishihara, Fuyuki Miya, Makiko  
Tsutsumi, Itaru Yanagihara, Naoko Fujita, Hiroyuki  
Yamamoto, Mitsuhiro Kato, Nobuhiko Okamoto,  
Tatsuhiko Tsunoda, Mami Yamasaki, Yonehiro  
Kanemura, Kenjiro Kosaki, Seiji Kojima, Shinji Saitoh,  
Hiroki Kurahashi & Jun Natsume

# Supplementary Figure S1

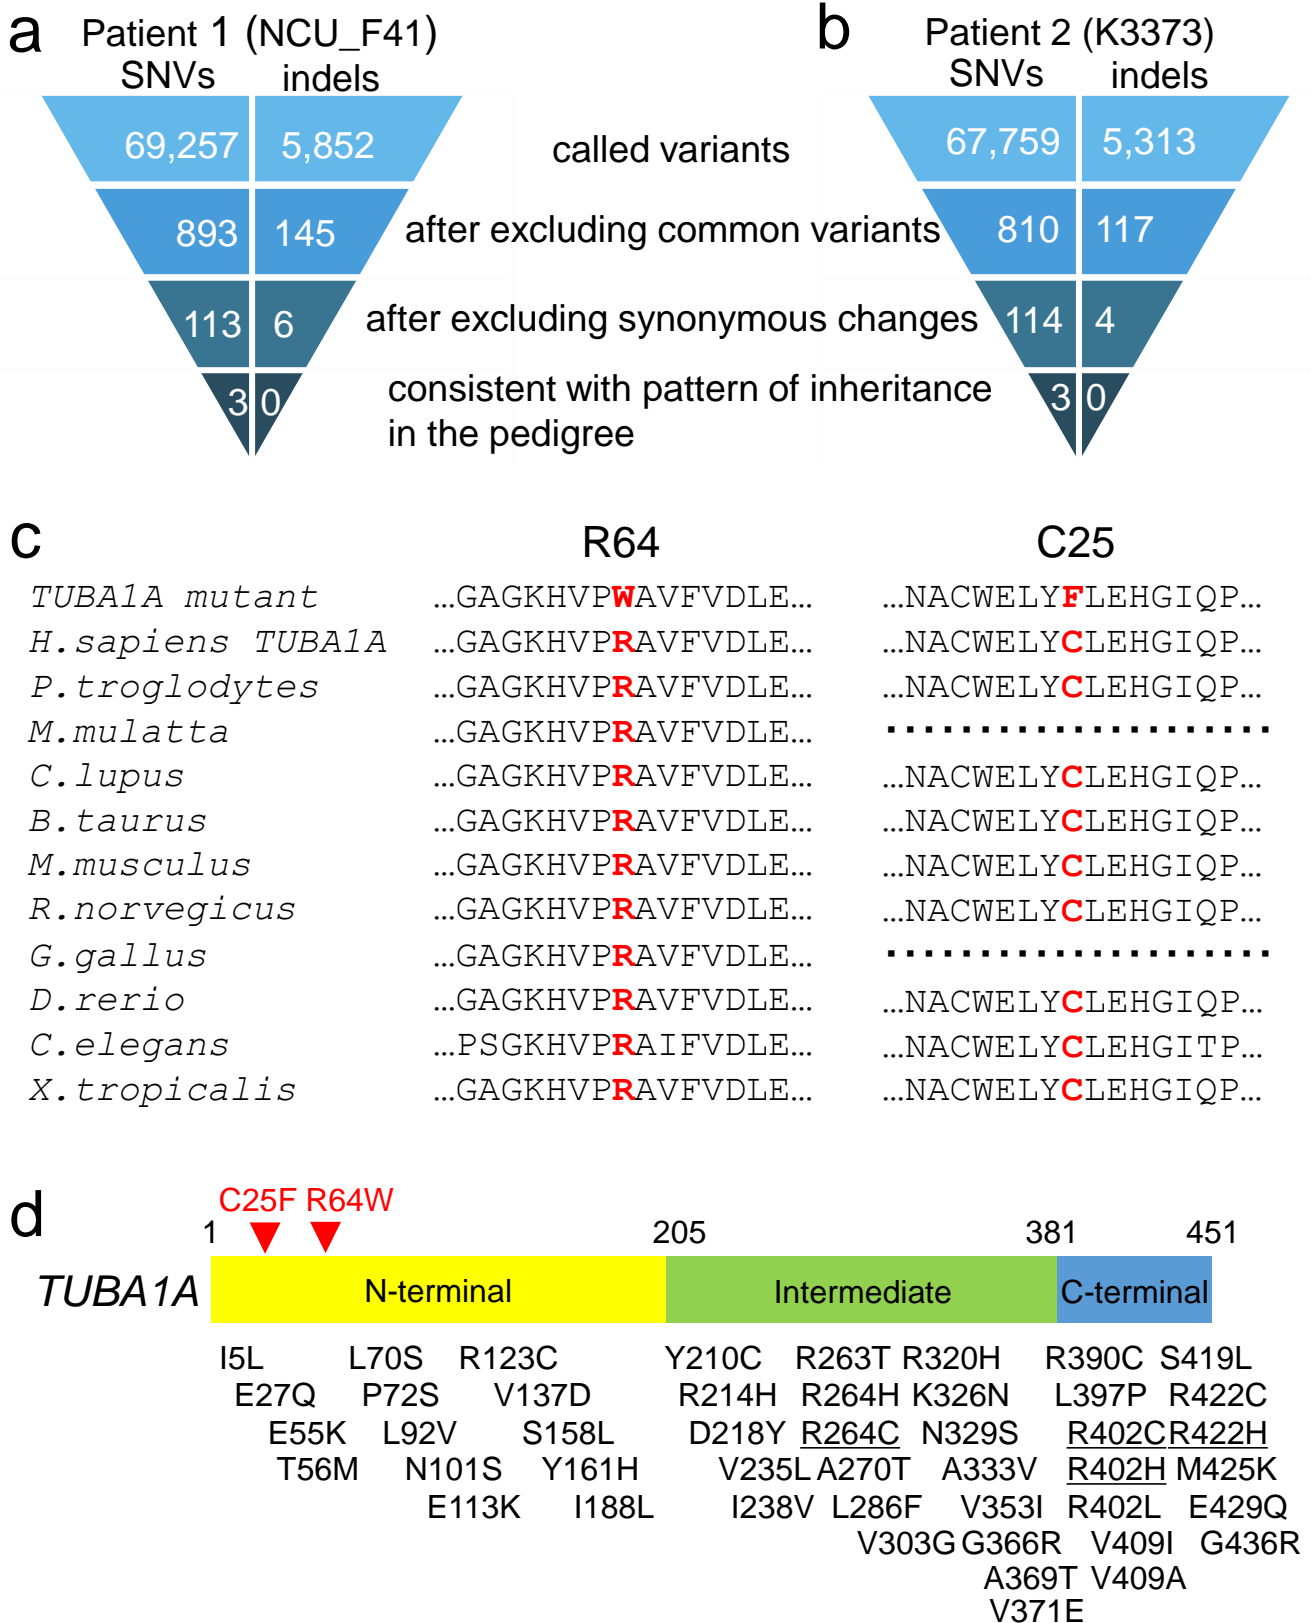

## Supplementary Figure S1

(a) The filtering steps for determining candidate mutations in NCU\_F41 (patient 1). The top row is the number of called variants by next-generation sequencing. The second row is the number of variants after filtering out known variants in databases, except for those that were also known pathogenic mutations. The third row is the number of variants after excluding synonymous change variants. The bottom row is the number of variants consistent with the phenotype in the pedigree (i.e., the total number of the autosomal recessive, X-linked recessive, *de novo*, and compound heterozygous variants). (b) The filtering steps for determining candidate mutations for the K3373 (patient 2). (c) Phylogenetic alignments for *TUBA1A* variations in this study. Mutant tubulin amino acid sequences are aligned against corresponding wild-type and equivalent tubulin homologues in other phylogenetic species. (d) Schematic representation of the functional domains of *TUBA1A* and mutations associated with previously reported malformations of cortical development<sup>25,26</sup>. Recurrent mutations of *TUBA1A* are underlined.

# Supplementary Figure S2

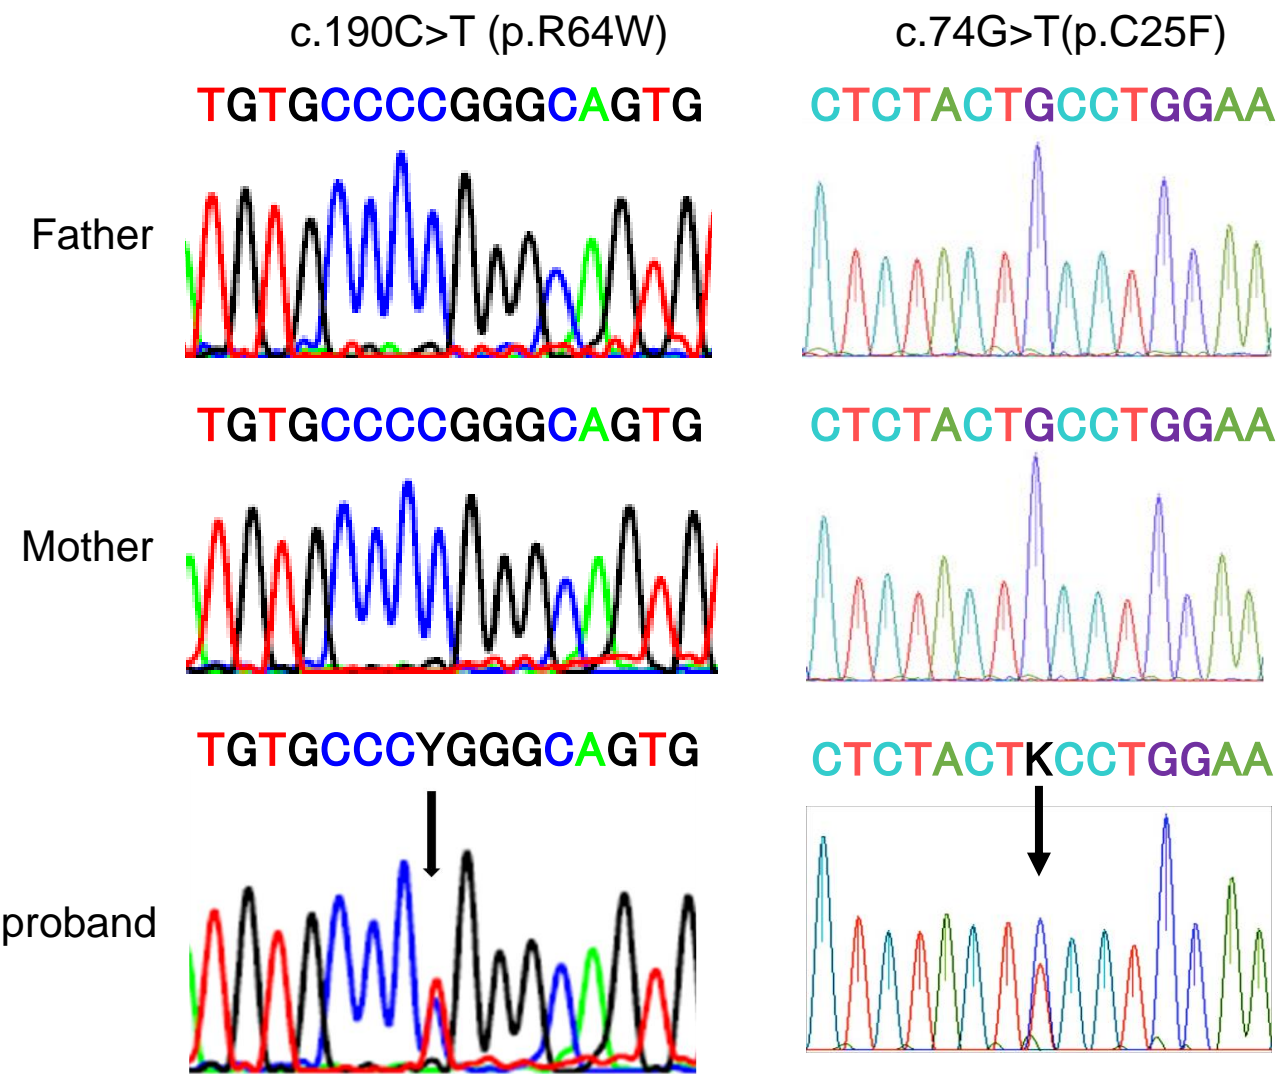

## Supplementary Figure S2

Validation of the *TUBA1A* mutations by Sanger sequencing. The missense mutations, c.190C>T (p.R64W) and c.74G>T (p.C25F), are shown. These variants are absent in the genomes of both their parents.

## Supplementary Figure S3

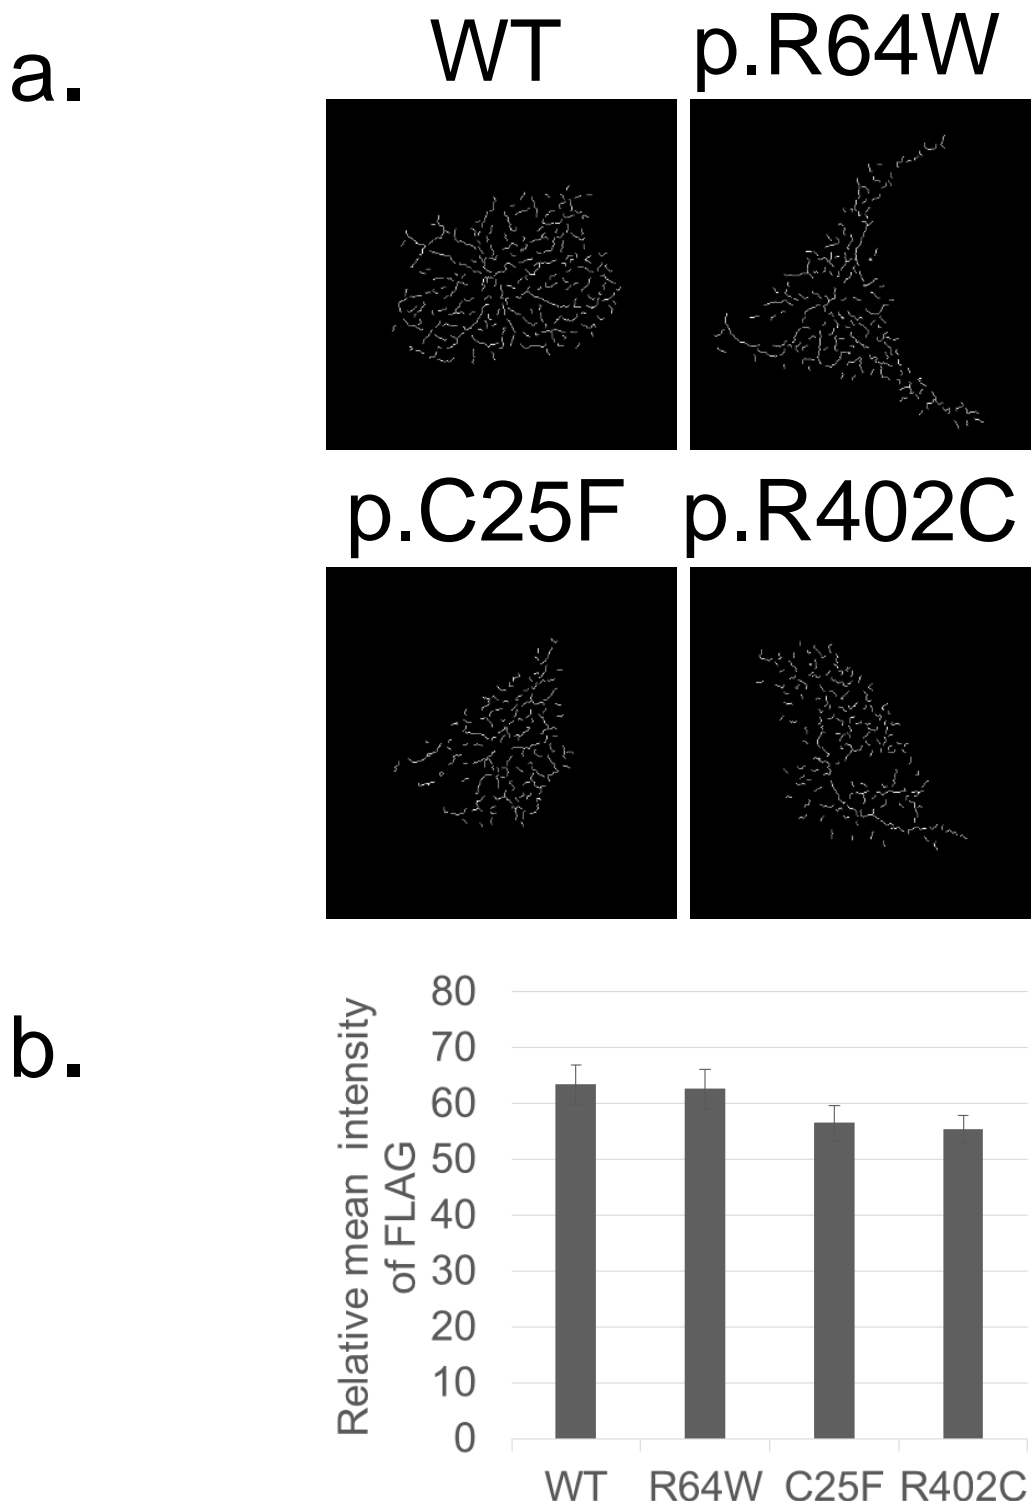

### Supplementary Figure S3

(a) The extracted lines of the cells in Fig.3 obtained using the ImageJ KBI Line Extract plug-in. (b) Relative mean FLAG intensity of the analysed cells. Bars are the means  $\pm$  SEM (32 cells from wild-type, 28 cells from R64W, 28 cells from C25F, and 31 cells from R402C). There were no statistically significant differences among WT and mutants.

## Supplementary Figure S4

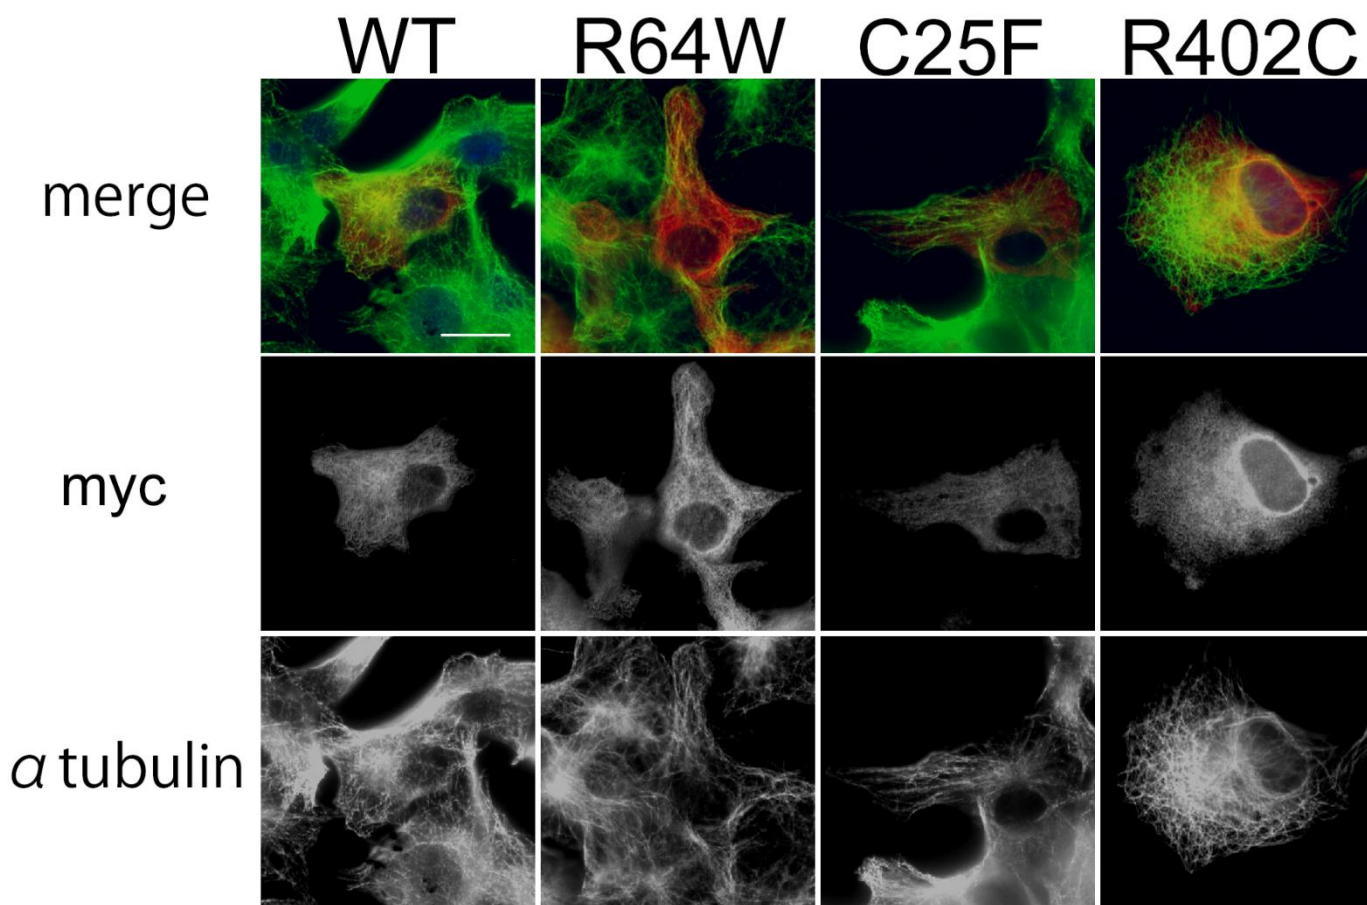

### Supplementary Figure S4

Representative images of myc-tagged TUBA1A. Myc-tagged wild-type TUBA1A was visualized as lines, suggesting that myc-tagged wild-type TUBA1A could incorporate into the endogenous microtubule network. Myc-tagged mutant TUBA1A could incorporate into the network to some extent. We observed more incorporated myc-tagged TUBA1A protein with R64W and C25F transfection than with R402C. Scale bar, 20 $\mu$ m.

# Supplementary Figure S5

a.

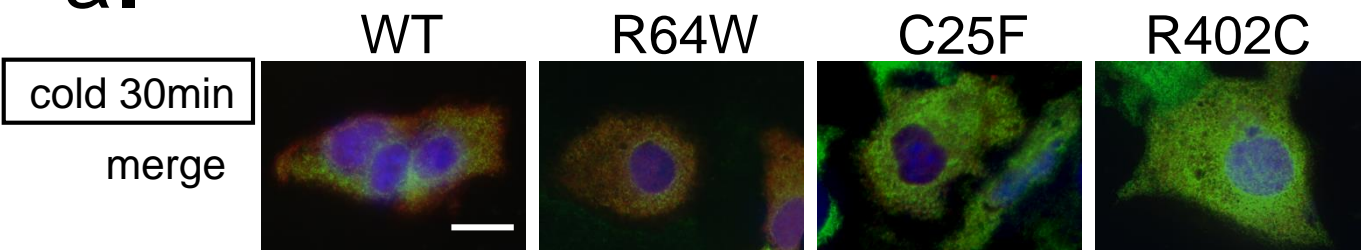

b.

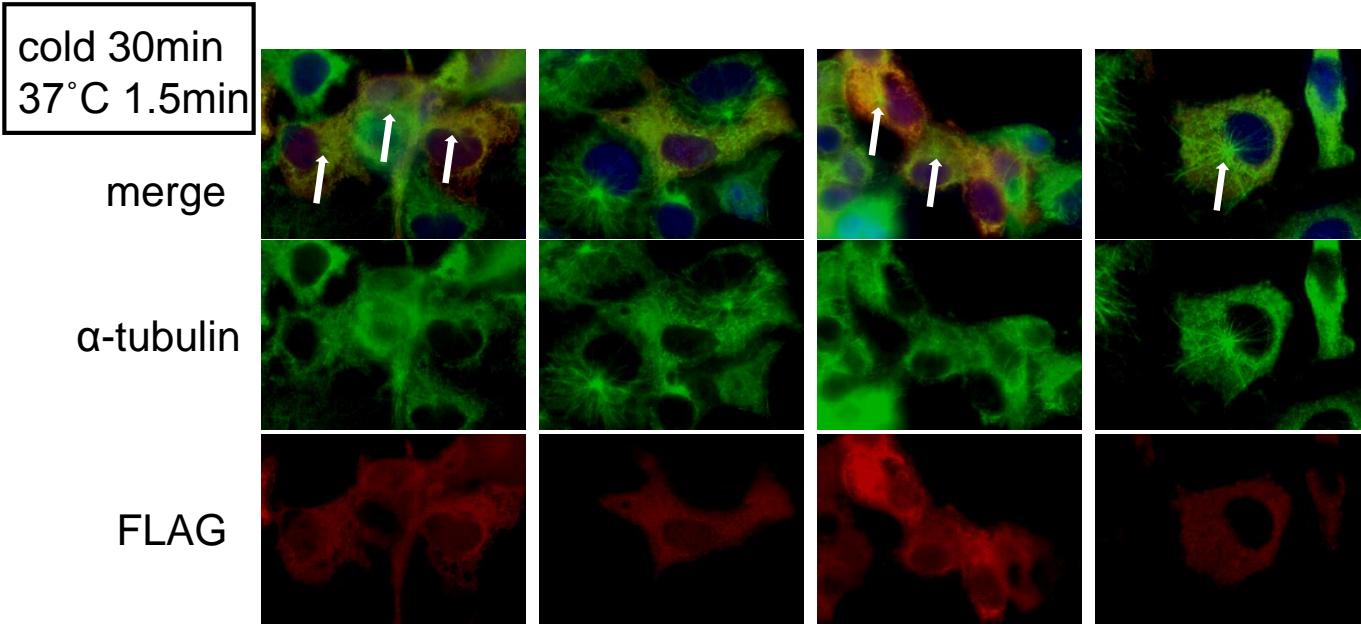

c.

|                                                                    | WT | R64W | C25F | R402C |
|--------------------------------------------------------------------|----|------|------|-------|
| cells containing the asters of $\alpha$ -tubulin (total 100 cells) | 86 | 62   | 76   | 83    |

\* (bracket between WT and R64W)

## Supplementary Figure S5

Repolymerisation after cold-induced depolymerisation. Scale bar, 20 $\mu$ m.  
(a) Transfected COS7 cells were incubated on ice for 30 min. Microtubules were completely depolymerised. (b) Cells were restored to 37°C 1.5 min after 30min cold treatment. Microtubules started to repolymerise from the asters (white arrows). (c) The number of cells containing the asters of  $\alpha$ -tubulin. In the case of p.R64W, only 62% of the cells contained the asters of  $\alpha$ -tubulin after 1.5min at 37°C, compared to 86% in wild-type-transfected cells. The difference for comparison R64W cells with control cells was statistically significant ( $p=0.00052$ , Fisher's exact test and Bonferroni correction).

# Supplementary Figure S6

a. TUBA1A\_forward : CACGTCGCTTGCACCAATCAC  
TUBA1A\_reverse : GAGGACACAATTTGACCTATTAACC  
HPRT\_forward : CTTCTCCTCCTGAGCAGTC  
HPRT\_reverse : AACACTTCGTGGGGTCCTTT

b. TUBA1A\_forward

|        |                                                              |     |
|--------|--------------------------------------------------------------|-----|
| TUBA8  | GGGC-----CCGGCG-----CGCCTGTCCC-----                          | 71  |
| TUBA3D | AGGA-----GGTTGCA-----GTTGGGCGCTCA-----                       | 132 |
| TUBA3E | AGGT-----CATTGCA-----GTTGGGCGCTCA-----                       | 40  |
| TUBA3C | GGGA-----GGCTGTC-----GTTGGGCGTGC-----                        | 42  |
| TUBA1A | TACCTCATCC <b>CACGTC-----GCTTGCACCAATCAC</b> CAGTC-TCCT----- | 136 |
| TUBA1C | GAGT--GCTTTGTGT-----GCTTGGA-----ATTAG--ATCCT-----            | 100 |
| TUBA1B | CAGCGACCGCGGCACC-----GCCTGTGC-----CCGCCCGCCCC-----           | 83  |
| TUBA4A | TA-----GCG-----CAG---TTCT-----                               | 36  |
| TUBAL3 | -----                                                        |     |

TUBA1A\_reverse

|        |                                                                       |      |
|--------|-----------------------------------------------------------------------|------|
| TUBA8  | ACCTATACCAACCTCAACCGCCTCATCAGTCAGATTGTGTCCTCAATCACTGCTTCTCTC          | 905  |
| TUBA3D | ACGTACACCAACCTCAATCGCCTGATTGGGCAGATCGTGTCTCCATCACAGCCTCCCTG           | 919  |
| TUBA3E | ACGTACACCAACCTCAATCGCCTGATTGGGCAGATCGTGTCTCCATCACAGCCTCCCTG           | 827  |
| TUBA3C | ACGTACACCAACCTCAATCGCCTGATTGGGCAGATCGTGTCTCCATCACAGCCTCCCTG           | 831  |
| TUBA1A | ACCTATACTAACCTGAATA <b>GGTTAATAGGTCAAATTGTGTCCTC</b> CATCACTGCTTCCCTG | 1071 |
| TUBA1C | ACCTACACTAACCTTAACCGCCTTATTAGCCAGATTGTGTCCTCCATCACTGCTTCCCTG          | 964  |
| TUBA1B | ACCTACACTAACCTTAACCGCCTTATTAGCCAGATTGTGTCCTCCATCACTGCTTCCCTG          | 947  |
| TUBA4A | ACCTACACCAACCTCAATCGCCTCATTAGCCAAATTGTCTCCTCCATCACAGCTTCTCTG          | 814  |
| TUBAL3 | TCTCATGCCAGCATCAATAGATTGGTGGTTCAGGTGGTATCTTCCATCACTGCCTCCCTC          | 785  |

\* \* \* \* \* \* \* \* \* \* \* \* \* \* \* \* \* \* \* \*

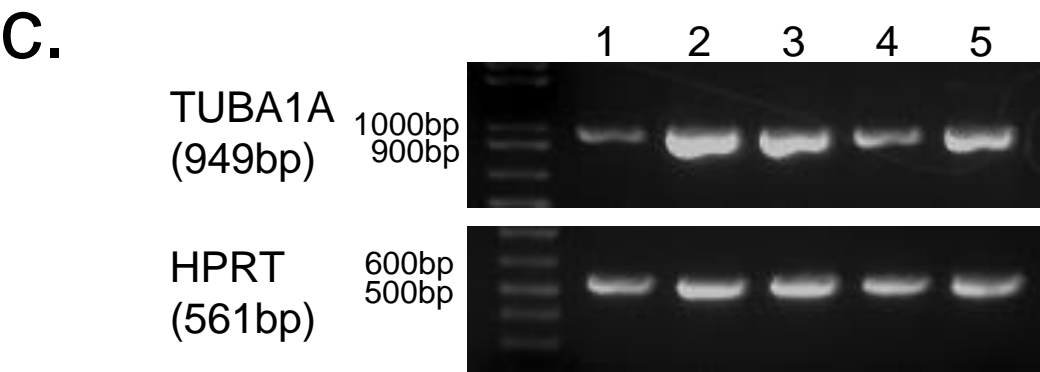

## Supplementary Figure S6

(a) Primer sequences are shown. (b) A part of  $\alpha$ -tubulin isoform cDNA aligned by ClustalW. Primer sequences were shown in red. Accession no. are TUBA8 NM\_018943.2, TUBA3D NM\_080386.3, TUBA3E NM\_207312.2, TUBA3C NM\_006001.2, TUBA1A NM\_006009.3, TUBA1C NM\_001303114.1, TUBA1B NM\_006082.2, TUBA4A NM\_006000.2, TUBAL3 NM\_024803.2. (c) RT-PCR using the primers specific for *TUBA1A*. Lane 1, control\_1 fibroblast; lane 2, N811; lane 3, N836; lane 4, C25F; lane 5, R64W.

# Supplementary Figure S7

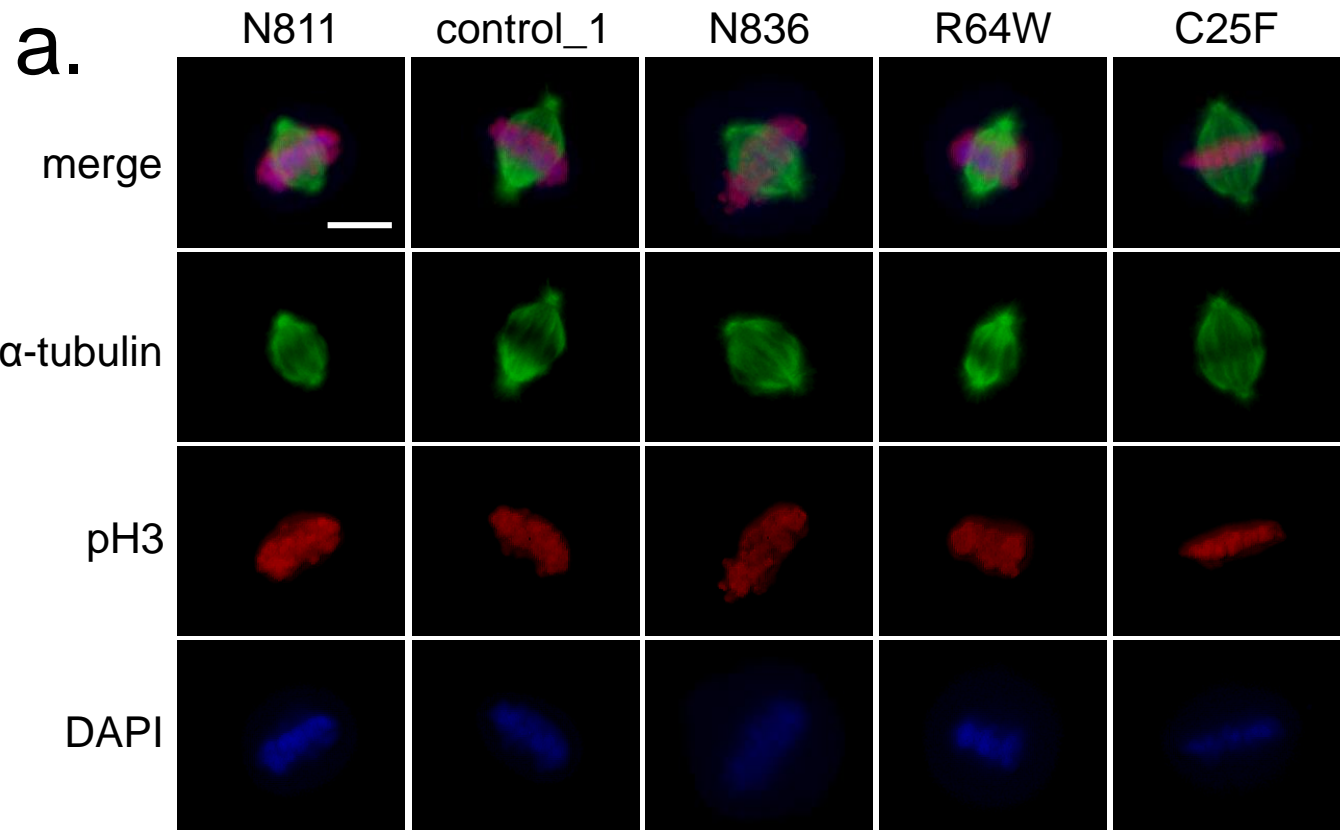

**b.**

|                         | R64W  | C25F  | control_1 | N836   | N811   |
|-------------------------|-------|-------|-----------|--------|--------|
| mitotic cell/total cell | 9/858 | 9/874 | 10/867    | 18/851 | 11/832 |
| mitotic index           | 1.05  | 1.03  | 1.15      | 2.12   | 1.32   |

## Supplementary Figure S7

(a) Representative images of mitotic spindle formation in fibroblasts. pH3, phosphorylated histone H3 (marker of mitotic chromatin). Scale bar, 10 $\mu$ m. (b) Mitotic index of fibroblasts. Mitotic cells were identified as pH3 positive cells by immunofluorescence. A chi-square test was used to compare mitotic index. There are no statistically significant differences between each group ( $p=0.256$ ).

# Supplementary Figure S8

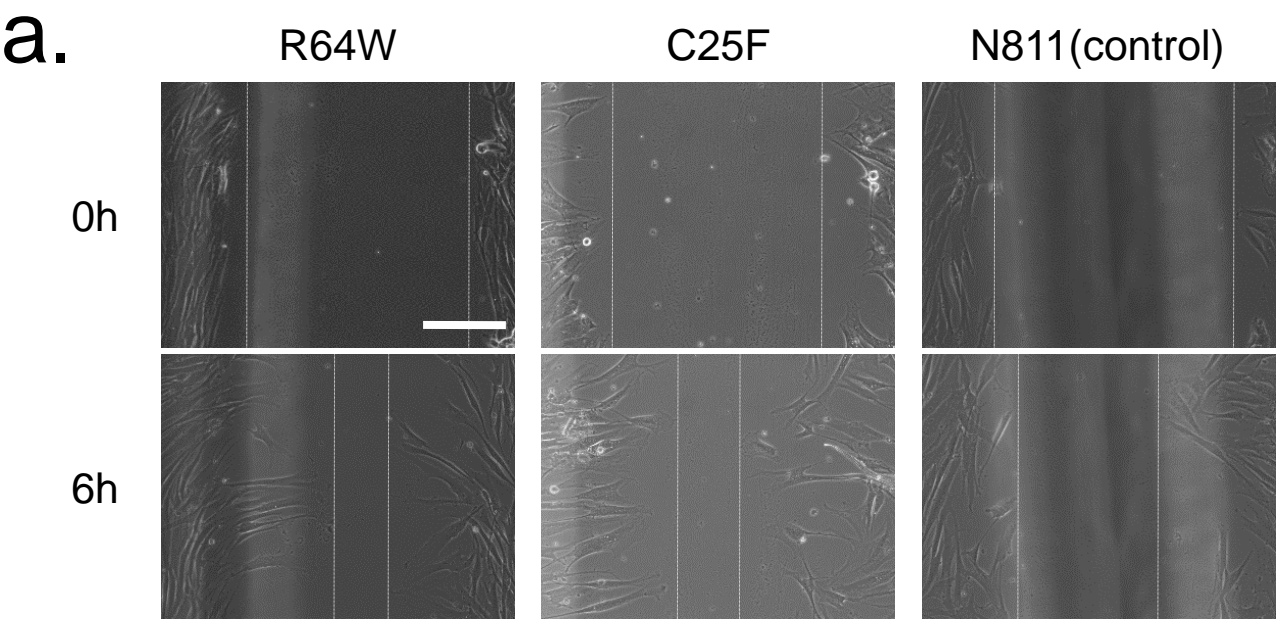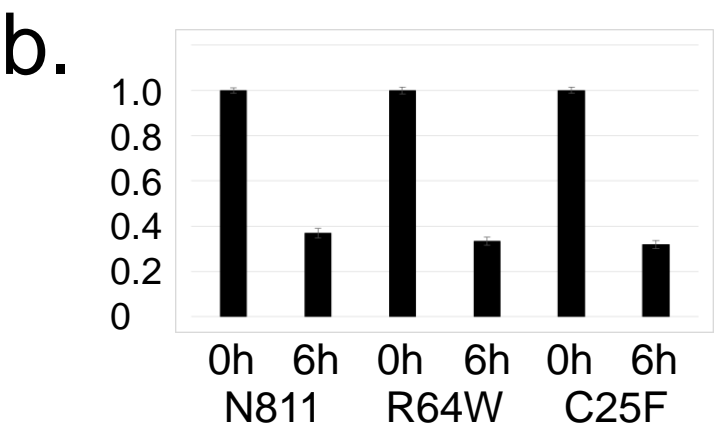

## Supplementary figure S8

(a) Analysis of passage 5 fibroblasts migration by *in vitro* scratch assay. Images were acquired at 0 and 6 h after scratch. Dotted lines defined the margins of fibroblasts. Distances between one side of scratch and the other were measured. Scale bar; 200µm. (b) The ratio of the average distances of 6h to that of 0h. The differences for comparison R64W and C25F cells with N811 cells were not statistically significant ( $p = 0.346$  and  $p = 0.144$ , respectively; one-way ANOVA and Tukey's post-hoc test).
